# Supplementary material for: Antiproteinuric therapy and Fabry nephropathy: factors associated with preserved kidney function during agalsidase-beta therapy
Source: PubMed Central journal article supplement — J Med Genet. 2015 Oct 21;52(12):860–6. doi: 10.1136/jmedgenet-2015-103471 (PMC4717450; doi:10.1136/jmedgenet-2015-103471), 2015-10-21
Supplement: jmedgenet-2015-103471-s1.pdf [file jmedgenet-2015-103471-s1.pdf]

## SUPPLEMENTARY MATERIALS

### **Anti-Proteinuric Therapy and Fabry Nephropathy; Factors Associated with Preserved Kidney Function During Agalsidase-Beta Therapy**

David G. Warnock,<sup>1</sup> Christie Thomas, MD,<sup>2</sup> Bojan Vujkovic, MD,<sup>3</sup> Joel Charrow, MD,<sup>4</sup> Ruth Campbell, MD,<sup>5</sup> Dawn Laney, MS,<sup>6</sup> Leslie Jackson, RN,<sup>1</sup> William R. Wilcox, MD PhD,<sup>6</sup> and Christoph Wanner, MD<sup>7</sup>

Author affiliations: <sup>1</sup>Division of Nephrology, Department of Medicine, University of Alabama at Birmingham, Birmingham, AL; <sup>2</sup>Department of Internal Medicine, University of Iowa Carver College of Medicine, Iowa City, IA; <sup>3</sup>General Hospital, Slovenj Gradec, Slovenia; <sup>4</sup>Department of Medicine, Medical University of South Carolina, Charleston, SC; <sup>5</sup>Departments of Pediatrics-Genetics, Northwestern University Feinberg School of Medicine and Ann & Robert H. Lurie Children's Hospital of Chicago, Chicago, IL; <sup>6</sup>Department of Human Genetics, Emory University, Atlanta, GA; and <sup>7</sup>Department of Nephrology, University Klinik Würzburg, Würzburg, Germany.

eTable 1. Study Sites, Investigators; 32 subjects enrolled; 24 subjects completed protocol

| Study Site Location      | Principal Investigator | Subjects Completing | Subjects not Completing | Reasons for Discontinuation                                                             |
|--------------------------|------------------------|---------------------|-------------------------|-----------------------------------------------------------------------------------------|
| Atlanta, GA (USA)        | A. Guasch              | 6                   | 1                       | Moved to Australia (visit 4)                                                            |
| Birmingham, AL (USA)     | R. Campbell            | 4                   | 1                       | ERT supply issues after visit 6                                                         |
| Boston, MA (USA)         | K. Sims                | 1                   | 1                       | Kidney transplantation after visit 5                                                    |
| Budapest (Hungary)       | G. Fekete              | 0                   | 1                       | ERT supply issues after visit 4                                                         |
| Chicago, IL (USA)        | J. Charrow             | 2                   | 2                       | Ineligible, discontinued after visit 1; withdrew consent after visit 4 (transportation) |
| Würzburg, Germany        | C. Wanner              | 0                   | 1                       | Withdrew consent after visit 3 (transportation)                                         |
| Iowa City, IA (USA)      | C. Thomas              | 6                   | 0                       |                                                                                         |
| Los Angeles, CA (USA)    | W. Wilcox              | 1                   | 1                       | Ineligible, discontinued after visit 1                                                  |
| New York, NY (USA)       | M. Velinov             | 2                   | 0                       |                                                                                         |
| Slovenj Gradec, Slovenia | B. Vujkovak            | 2                   | 0                       |                                                                                         |

Abbreviations: ERT, enzyme replacement therapy; USA, United States of America;

eTable 2. Baseline Renal and Cardiac Status of FAACET Participants; stratified at baseline eGFR  $\geq$  or  $<$  60 ml/min/1.73 m<sup>2</sup>

| Baseline eGFR $\geq$ 60 ml/min/1.73 m <sup>2</sup> |                  |        |      |       |      |                                         |                                   |                          |
|----------------------------------------------------|------------------|--------|------|-------|------|-----------------------------------------|-----------------------------------|--------------------------|
| ID                                                 | Genotype         | A/G/R  | UPCR | ACR   | eGFR | Con_Meds                                | ECHO                              | EKG                      |
| 02                                                 | p.R227X          | 40/F/W | 0.97 | 782   | 93   | Losar 100 mg                            | SWT 9mm; Regurg                   | Brady                    |
| 03                                                 | p.R227Q          | 23/M/W | 0.62 | 7     | 120  |                                         | SWT 9mm; Regurg                   | Brady, NS-STT            |
| 04                                                 | p.R227X          | 52/F/W | 0.70 | 261   | 100  | Irbesar 160 mg                          | LVH, SWT 13 mm, Regurg, Diast_Dys | NS-STT, BBB              |
| 05                                                 | p.W287C          | 55/F/W | 0.05 | 49    | 63   | Irbesar 320 mg; HCTZ 25 mg; Metop 25 mg | LVH, SWT 15 mm, Regurg, Diast_Dys | Brady, NS-STT, LVH, Afib |
| 07                                                 | p.M43T           | 46/F/W | 0.88 | 245   | 89   | Lisin 40 mg; HCTZ 25 mg                 | SWT 9mm; Diast_Dys                | NS-STT                   |
| 08                                                 | p.L120P, p.A121T | 35/M/W | 2.86 | 1,398 | 71   | Lisin 10 mg                             | SWT 12mm, LVH, Regurg, Aort_Dil   | LVH, Cond_Abnorm         |
| 09                                                 | 1188 insT        | 42/M/W | 0.12 | 89    | 62   | Lisin 10 mg                             | SWT 12mm, Regurg                  | LVH                      |
| 10                                                 | p.W204X          | 49/W/M | 0.10 | 15    | 75   | Lisin 10 mg                             | LVH; SWT 16mm; Regurg             | LVH                      |
| 11                                                 | 821insG          | 40/M/W | 0.40 | 105   | 63   | Lisin 15 mg                             | SWT 11mm; Regurg                  | LVH, PAC, Cond_Abnorm,   |
| 13                                                 | p.W340X          | 47/M/B | 0.54 | 22    | 92   | Irbesar 75 mg                           | LVH; SWT 13mm; Regurg             | BBB                      |
| 14                                                 | p.R342Q          | 37/F/W | 0.32 | 144   | 117  | Ramip 2.5 mg                            | SWT 9mm; Regurg                   | Brady                    |
| 15                                                 | p.R342Q          | 37/M/W | 1.08 | 672   | 70   | Losar 50 mg                             | LVH; SWT 16mm; Regurg             | LVH, Brady               |
| 19                                                 | p.D264Y, p.V269M | 42/M/W | 2.49 | 1,110 | 82   | Losar 100 mg                            | SWT 12mm, Aort_Dil                | NS-STT                   |
| 20                                                 | C717 del3        | 29/M/W | 0.42 | 114   | 102  | Losar 50 mg                             | SWT 9mm; Regurg                   | PAC, Cond_Abnorm         |
| 21                                                 | p.W277X          | 49/F/B | 0.75 | 38    | 69   | Lisin 80, Losar 100, Felod 5            | LVH; SWT 12mm; Regurg             | NS-STT, PAC              |
| 22                                                 | p.R227X          | 31/F/W | 0.52 | 555   | 130  | Lisin 20, Losar 50                      | SWT 10mm; Regurg                  | Brady, NS-STT, LVH       |

| Baseline eGFR <60 ml/min/1.73 m <sup>2</sup> |           |        |      |       |      |                                            |                                    |                               |
|----------------------------------------------|-----------|--------|------|-------|------|--------------------------------------------|------------------------------------|-------------------------------|
| ID                                           | Genotype  | A/G/R  | UPCR | ACR   | eGFR | Con_Meds                                   | ECHO                               | EKG                           |
| 01                                           | p.T194I   | 43/M/W | 2.04 | 1,559 | 42   | Irbesar 75 mg                              | LVH; SWT 15mm;<br>Regurg, Akinesis | Brady, LVH                    |
| 06                                           | 1118 del1 | 55/M/W | 0.11 | 28    | 56   | Lisin 2.5 mg, Metop 25 mg                  | LVH, Regurg,<br>Diast_Dys          | ICD,<br>Cond_Abnorm           |
| 12                                           | 1139 delC | 44/F/W | 1.13 | 1,468 | 34   | Lisin 20 mg, Nadol 20 mg                   | LVH; SWT 11mm;<br>Regurg           | Brady,<br>Cond_Abnorm         |
| 16                                           | p.N272K   | 41/M/W | 1.48 | 57    | 38   |                                            | SWT 11mm; Regurg                   | Brady,<br>Cond_Abnorm         |
| 17                                           | p.R227X   | 44/M/W | 0.40 | 459   | 40   | Ramip 6.25 mg                              | LVH; SWT 15mm;<br>Regurg           | NS-STT                        |
| 18                                           | p.N272S   | 52/M/W | 1.40 | 736   | 46   | Ramip 5 mg                                 | LVH; SWT 13mm;<br>Regurg           | NS-STT                        |
| 23                                           | p.W227X   | 52/M/B | 2.28 | 2,014 | 53   | Enal 10 mg, Torsem 50<br>mg, Metop 12.5 mg | LVH; SWT 15mm;<br>Regurg           | LVH, PAC, PVC,<br>Cond_Abnorm |
| 24                                           | 717 del2  | 53/M/W | 0.33 | 101   | 52   | Metop 25 mg                                | LVH; SWT 13mm;<br>Regurg           | Afib, PVC, ICD                |

Abbreviations: ACR, albumin to creatinine ratio (mg/gm); Afib, atrial fibrillation; A/G/R, age, gender, race; B, black; BBB, bundle branch block; Brady, bradycardia; Con\_Meds; concomitant medications; Cond\_Abnorm, conduction abnormality; Diast\_Dys, diastolic dysfunction; ECHO, echocardiogram; EKG, electrocardiogram; eGFR, estimated glomerular filtration rate (ml/min/1.73 m<sup>2</sup>); Enal, Enalapril; F, female; Felod; Felodipine; HCTZ, hydrochlorothiazide; ICD, intracardiac device; Irbesar, Irbesartan; Lisin, Lisinopril; Losar, Losartan; LVH, left ventricular hypertrophy; M, male; M, Metoprolol; NS-STT, non-specific ST-T wave changes; Nadol, Nadolol; PAC, premature atrial contraction; PVC, premature ventricular contractions; Ramip, Ramipril; SWT, septal wall thickness; Regurg, regurgitation; Toresm, Toresemide; UPCR, urine protein to creatinine ratio (gm/gm); W, white.

eTable 3A. FAACET Participants stratified by UPCR Goal and eGFR slope at  $-2.0$  ml/min/ $1.73$  m<sup>2</sup>/year  
N=6: Met UPCR Goal & Slope  $> -2.0$  ml/min/ $1.73$  m<sup>2</sup>/year

| ID | Age/Sex<br>Race | Genotype             | Slope         | Inter-<br>cept | Averaged Values |             |           | Max<br>K <sup>+</sup> | Con_Meds: Last Visit<br>(Medication Score) | Adverse<br>Events |
|----|-----------------|----------------------|---------------|----------------|-----------------|-------------|-----------|-----------------------|--------------------------------------------|-------------------|
|    |                 |                      |               |                | UPCR            | ACR         | SBP       |                       |                                            |                   |
| 3  | 23/M/W          | p.R227Q              | -1.08         | 125            | 0.15            | 24          | 102       | 3.8                   | Losar 12.5 (1)                             |                   |
| 4  | 52/F/W          | p.R227X              | 1.28          | 98             | 0.44            | 220         | 123       | 4.0                   | Irb 160; Enal 10 (2)                       |                   |
| 6  | 55/M/W          | 1118del              | -1.70         | 70             | 0.11            | 18          | 111       | 5.2                   | Losar 37.5, Carv 3.1 (1)                   | ↑K <sup>+</sup>   |
| 11 | 40/M/W          | 82insG               | 0.59          | 81             | 0.52            | 234         | 102       | 4.4                   | Lisin 30 (1)                               | ↓BP<br>↓Hgb       |
| 16 | 41/M/W          | p.N272K              | -0.74         | 30             | 0.10            | 11          | 103       | 5.4                   | Lisin 20, HCTZ 25 (2)                      |                   |
| 22 | 31/F/W          | p.R227X              | 1.58          | 124            | 1.05            | 673         | 104       | 6.1                   | Lisin 10, Losar 50 (2)                     | ↑K <sup>+</sup>   |
|    | 41±12           | Mean±SD<br>or Median | -0.01<br>±1.3 | 88<br>±36      | 0.40<br>±0.37   | 197<br>±254 | 108<br>±5 | 4.9<br>±0.9           | 1.5 (1 - 2)                                |                   |
|    | 4 M/0 B         | Min                  | -1.7          | 30             | 0.1             | 11          | 102       | 3.8                   | 1                                          |                   |
|    |                 | Max                  | 1.6           | 126            | 1.1             | 673         | 123       | 6.1                   | 2                                          |                   |

eTable 3B. N=12: Met UPCR Goal & Slope  $< -2.0$  ml/min/ $1.73$  m<sup>2</sup>/year

| ID | Age/Sex<br>Race | Genotype | Slope  | Inter-<br>cept | Averaged Values |       |     | Max<br>K <sup>+</sup> | Con_Meds: Last Visit<br>(Medication Score) | Adverse<br>Events   |
|----|-----------------|----------|--------|----------------|-----------------|-------|-----|-----------------------|--------------------------------------------|---------------------|
|    |                 |          |        |                | UPCR            | ACR   | SBP |                       |                                            |                     |
| 1  | 43/M/<br>W      | p.T194I  | -3.703 | 41             | 0.91            | 618   | 106 | 5.7                   | Irb 80, Ram 10 (2)                         | ↑K <sup>+</sup> ↓BP |
| 5  | 55/F/W          | p.W287C  | -5.005 | 52             | 0.36            | 233   | 109 | 4.8                   | Irb 160, HCTZ 12.5,<br>Metop 100 (2)       | ↓BP                 |
| 7  | 46/F/W          | p.M42T   | -4.077 | 70             | 1.30            | 1,200 | 127 | 4.7                   | Lisin 40, Losar 100<br>HCTZ 25 (3)         | ↓BP                 |
| 9  | 42/M/<br>W      | 1188insT | -5.549 | 56             | 0.50            | 323   | 126 | 4.1                   | Losar 100 (3)                              | Edema               |
| 10 | 49/M/<br>W      | p.W204X  | -6.441 | 85             | 0.12            | 39    | 133 | 4.9                   | Lisin 10 (1)                               |                     |

|    |                   |                      |                |           |               |             |            |             |                                             |              |
|----|-------------------|----------------------|----------------|-----------|---------------|-------------|------------|-------------|---------------------------------------------|--------------|
| 12 | 44/F/W            | 1139delC             | -3.470         | 36        | 0.50          | 365         | 99         | 4.6         | Lisin 40, Nadol 10, Nifed 30 (3)            | ↓BP, PTCA    |
| 13 | 47/M/B            | p.W340X              | -2.645         | 86        | 0.21          | 116         | 131        | 4.2         | Irb 75, Furos 40 (2)                        | Cardiac Cath |
| 14 | 37/F/W            | p.R342Q              | -5.91          | 104       | 0.26          | 81          | 98         | 4.9         | Ram 2.5, Irb 320 (3)                        | ↓BP          |
| 15 | 37/M/W            | p.R112S              | -4.22          | 48        | 0.34          | 217         | 112        | 5.0         | Lisin 20, Losar 200 (3)                     | ↓BP          |
| 19 | 42/M/W            | p.D264Y, p.V269M     | -2.35          | 74        | 1.20          | 865         | 130        | 4.7         | Losar 200 (3)                               |              |
| 21 | 49/F/B            | p.W277X              | -4.81          | 60        | 0.41          | 276         | 130        | 5.3         | Lisin 80, Losar 100, Felod 10, Spiro 25 (3) |              |
| 24 | 53/M/W            | 717del2              | -4.13          | 56        | 0.26          | 130         | 113        | 5.5         | Losar 25, Metop 25 (1)                      | ↑K+          |
|    | 48 (6)<br>6 M/2 B | Mean±SD<br>or Median | -4.36<br>±1.25 | 65<br>±20 | 0.53<br>±0.39 | 372<br>±352 | 118<br>±13 | 4.9<br>±0.5 | 3 (2 - 3)                                   |              |
|    |                   | Min                  | -6.44          | 36        | 0.12          | 39          | 98         | 4.1         | 1                                           |              |
|    |                   | Max                  | -2.35          | 104       | 1.29          | 1,200       | 133        | 5.7         | 3                                           |              |

eTable 3C. N=6: Above UPCR Goal & Slope < -2.0 ml/min/1.73 m<sup>2</sup>/year

| ID | Age/Sex<br>Race | Genotype            | Slope | Inter-<br>cept | Averaged Values |       |     | Max<br>K+ | Con_Meds: Last Visit    | Adverse<br>Events |
|----|-----------------|---------------------|-------|----------------|-----------------|-------|-----|-----------|-------------------------|-------------------|
|    |                 |                     |       |                | UPCR            | ACR   | SBP |           |                         |                   |
| 2  | 40/F/W          | p.R227X             | -4.48 | 82             | 0.75            | 501   | 116 | 4.0       | Losar 100, Lisin 10 (3) |                   |
| 8  | 35/M/W          | p.L120P,<br>p.A121T | -14.4 | 55             | 2.40            | 1,650 | 108 | 4.6       | Lisin 40, Losar 100 (3) | Polyuria          |
| 17 | 44/M/W          | p.R227X             | -6.93 | 43             | 0.68            | 454   | 120 | 5.6       | Ram 7.5 (1)             | ↑K+               |
| 18 | 52/M/W          | p.N272S             | -5.59 | 45             | 0.96            | 657   | 117 | 5.5       | Ram 8.75 (1)            | ↑K+               |

|    |         |                      |                |           |               |              |             |             |                                   |                     |
|----|---------|----------------------|----------------|-----------|---------------|--------------|-------------|-------------|-----------------------------------|---------------------|
| 20 | 29/M/W  | C717 delAA           | -9.02          | 95        | 0.53          | 259          | 107         | 4.0         | Losar 50 (1)                      | Fatigue             |
| 23 | 52/M/B  | p.W277X              | -7.09          | 56        | 1.50          | 733          | 95          | 5.2         | Enal 10, Torse 60, Metop 12.5 (3) | ↓BP ↑K <sup>+</sup> |
|    | 42 (9)  | Mean±SD<br>or Median | -7.92<br>±3.53 | 63<br>±21 | 1.14<br>±0.70 | 708<br>±489  | 110<br>±9.1 | 4.8<br>±0.7 | 1.5 (1 - 3)                       |                     |
|    | 5 M/1 B | Min<br>Max           | -14.4<br>-4.47 | 43<br>95  | 0.53<br>2.35  | 259<br>1,650 | 96<br>120   | 4.0<br>5.6  | 1<br>3                            |                     |

Continuous variables presented as median (25<sup>th</sup> – 75<sup>th</sup>-tile), categorical variables as median (25<sup>th</sup> –75<sup>th</sup>-centile); Medication Score defined as: 0, none; 1, ACE Inhibitor or ARB; 2, ACE Inhibitor plus ARB, or Beta Blocker; 3, ACE Inhibitor or ARB at maximum dose. Abbreviations: ACR, albumin to creatinine ratio (mg/g); Afib, atrial fibrillation; A/G/R, age, gender, race; B, black; BP, blood pressure; Cardiac Cath, cardiac catheterization; Carv, Carvedilol; Con\_Meds; concomitant medications; eGFR, estimated glomerular filtration rate (ml/min/1.73 m<sup>2</sup>); Enal, Enalapril; F, female; Felod, Felodipine; HCTZ, hydrochlorothiazide; Irbesar, Irbesartan; K<sup>+</sup>, serum potassium; Lisin, Lisinopril; Losar, Losartan; M, male; M, Metoprolol; Nadol, Nadolol; PTCA, percutaneous transluminal angioplasty; Ramip, Ramipril; Toresm, Toresemide; UPCR, urine protein to creatinine ratio (gm/gm); W, white.
